# Supplementary material
Source: PubMed Central journal article supplement (PMC3212653)
Supplement: NIHMS331045-supplement-1_si_001.pdf [file NIHMS331045-supplement-1_si_001.pdf]

## Reactive Oxygen Species Driven Angiogenesis by Inorganic Nanorods

Chitta Ranjan Patra<sup>1,2,\*</sup>, Jong Ho Kim<sup>3,4</sup>, Kallal Pramanik<sup>5§</sup>, Livius V. d'Uscio<sup>6</sup>,  
Sujata Patra<sup>2</sup>, Krishnendu Pal<sup>2</sup>, Ramani Ramchandran<sup>5</sup>, Michael S Strano<sup>3</sup>,  
Debabrata Mukhopadhyay<sup>2,7\*</sup>

<sup>1</sup>Department of Chemical Biology, Indian Institute of Chemical Technology, Uppal Road, Tarnaka, Hyderabad - 500607, AP, INDIA

<sup>2</sup>Department of Biochemistry and Molecular Biology, 200 First Street S.W., Mayo Clinic College of Medicine, Mayo Foundation, Rochester, MN 55905, USA

<sup>3</sup>Department of Chemical Engineering, Massachusetts Institute of Technology, Cambridge, Massachusetts 02139

<sup>4</sup>Department of Chemical Engineering, Hanyang University, Ansan 426-791, Republic of Korea

<sup>5</sup>Developmental Biology Division, Developmental Vascular Biology Program, Medical College of Wisconsin and Children's Research Institute, Milwaukee, Wisconsin 53226 <sup>§</sup>Current address: Prescient Life Science, New Delhi

<sup>6</sup>Department of Anesthesiology and Molecular Pharmacology, Mayo Clinic College of Medicine, Rochester, MN 55905, USA

<sup>7</sup>Department of Biomedical Engineering, 200 First Street S.W., Mayo Clinic College of Medicine, Mayo Foundation, Rochester, MN 55905, USA

**\*To whom correspondence should be addressed**

**Chitta Ranjan Patra, Ph.D**

<sup>1</sup>Department of Chemical Biology  
Indian Institute of Chemical Technology,  
Uppal Road, Tarnaka, Hyderabad - 500007, AP, INDIA  
Tel: +91-8106737026 (Mobile), +91-40-27191809 (O)  
Fax: +91-40-27160387/27160757

**E-Mail:** [CRPatra@iict.res.in](mailto:CRPatra@iict.res.in)

Additional e-mail ID: [patra.chitta@gmail.com](mailto:patra.chitta@gmail.com)

**Debabrata Mukhopadhyay,**

<sup>2,6</sup>Department of Biochemistry and Molecular Biology,  
Gugg 13-21C, Mayo Clinic College of Medicine,  
200 First St. S.W., Rochester MN 55905.  
Tel: 507-538-3581; Fax: 507-293-1058

**E-mail:** [mukhopadhyay.debabrata@mayo.edu](mailto:mukhopadhyay.debabrata@mayo.edu)

**Running title:** Inorganic nanorods in angiogenesis

**Materials and methods:**

Europium(III) nitrate hydrate [Eu(NO<sub>3</sub>)<sub>3</sub>.xH<sub>2</sub>O, 99.99%], aqueous ammonium hydroxide [aq.NH<sub>4</sub>OH, 28–30% ], europium(III) oxide nanopowder, and *N*-acetyl-L-cysteine (NAC) were purchased from Sigma-Aldrich (USA) and were used without further purification. HUVECs were purchased from American Type Culture Collection (ATCC, USA). EBM medium and the individual components for making EBM complete medium were obtained from Cambrex Bio Science Walkersville, Inc. (MD, USA). [<sup>3</sup>H]Thymidine was purchased from Amersham Biosciences (Piscataway, NJ). Mn(III)tetrakis(4-benzoic acid) porphyrin chloride (MnTBAP) was purchased from BIOMOL (USA). Catalase (C-100) was obtained from Sigma-Aldrich. Dihydroethidium (hydroethidine) was purchased from Molecular Probes. Single-walled carbon nanotubes were purchased from Nano-C, Inc. Type I collagen was purchased from BD Biosciences. Glass-bottom Petri dishes were purchased from MatTek Corp. L-15 medium was purchased from ATCC. Acetic acid was purchased from Sigma-Aldrich.

**Microwave-assisted Synthesis of Europium Hydroxide [Eu<sup>III</sup>(OH)<sub>3</sub>] Nanorods**

The synthesis of Eu<sup>III</sup>(OH)<sub>3</sub> nanorods was carried out according to our previous publications with some modifications<sup>1</sup>. Briefly, 1 ml of aqueous NH<sub>4</sub>OH was added to 39 ml of an aqueous solution of 676 mg Eu(III) nitrate (NH<sub>4</sub>OH/Eu<sup>3+</sup> molar ratio of 4; pH 5.5) in a 100-ml round-bottom flask. The resulting solution was irradiated for 60 min at 60% of maximum power (on/off irradiation cycles in the ratio of 3/2) in a microwave oven (GOLD STAR 1000W with 2.45 GHz frequency). In the post-reaction treatment, the microwaved products were collected, centrifuged at 10,000 rpm, washed several times

while alternating between Millipore H<sub>2</sub>O and ethanol, washed again with Millipore H<sub>2</sub>O, and finally dried overnight under vacuum at room temperature.

### **Nanorod Solution Preparation**

Solid crystalline Eu<sup>III</sup>(OH)<sub>3</sub> nanorods (100 mg) were added to 10 ml of sterile TE (Tris-EDTA) buffer and incubated for 5 sec in a sonicator bath to make a homogeneous suspension of 10 mg/ml. This freshly prepared stock solution was used for all cell culture experiments and *in vivo* toxicity experiments.

### **Detection of Endotoxin**

Millipore H<sub>2</sub>O, used for all experiments in our research, was tested for endotoxin using the Gel-clot method according to the manufacturer's instructions (Pyrotell® Multi-test; Cat # GS250; Associates of Cape Cod, MA). The formation of a gel clot indicates the presence of endotoxin in a sample. However, we did not observe any gel clots, confirming the absence of endotoxin in the water. Similarly, prior to incubation with HUVEC endothelial cells for cell proliferation studies, we tested the nanorod suspension in TE buffer for possible endotoxin contamination.

### **Cell Culture and Cell Proliferation Assay**

HUVEC (passage 3; P3) were cultured in 100-mm plates for ~24 h at 37°C and 5% CO<sub>2</sub> in complete EBM medium. The [<sup>3</sup>H]-thymidine incorporation assay was carried out as previously reported<sup>1a</sup>. Briefly, HUVEC (2 x 10<sup>4</sup>) were seeded in 24-well plates, cultured for one day in EBM, serum-starved (0.1% serum) for 24 hours, and then treated with different concentrations of Eu<sup>III</sup>(OH)<sub>3</sub> nanorods with and without N-acetyl-L-cysteine, MnTBAP, and catalase. After 24 hours, 1 μCi [<sup>3</sup>H]-thymidine was added to each well.

Four hours later, cells were washed with cold PBS, fixed with 100% cold methanol, and collected for the measurement of trichloroacetic acid-precipitable radioactivity. Experiments were performed in triplicate.

### **Zebrafish Studies**

Zebrafish were grown and maintained at 28.5 °C in a 14 h day and 10 h night cycle. Mating was routinely carried out at 28.5°C, and all embryos were staged according to established protocols <sup>2</sup>. All zebrafish studies were performed under the MCW institutional guidelines (Animal Protocol Number 312-06-2). Adult Tg(fli1a:EGFP) line was purchased from the zebrafish information network (ZFIN). The SIV (subintestinal vessels) were analyzed at 72 hpf, and photomicrographs were taken using a Leica MZ 16FA stereomicroscope, (Leica Microsystems) with 1x planapochromatic objective and 10x eyepiece in 100x zoom. The image acquisition software used was Image-Pro AMS 6.0 (Media Cybernetics, Bethesda, MD).

### **Superoxide anion (O<sub>2</sub>•<sup>-</sup>) determination by an HPLC method**

HPLC is a standard method for detection and quantification of intracellular superoxide anion (O<sub>2</sub>•<sup>-</sup>) in HUVEC <sup>3</sup>. The product of the HE and (O<sub>2</sub>•<sup>-</sup>) reaction has been previously characterized <sup>3a</sup>. A stable fluorescent product, 2-hydroxyethidium, is formed from the reaction between dihydroethidium and superoxide anion. Briefly, HUVEC were grown in EBM media with serum, which was replaced by serum-free EBM medium one day before the study. On the day of the experiment, the cells were rinsed three times with chilled Krebs-Hepes buffer and preincubated with MnTBAP for 15 min at 37°C in a CO<sub>2</sub> incubator before the addition of Eu<sup>III</sup>(OH)<sub>3</sub> nanorods (24 hours). On the day of measurement for superoxide anion (O<sub>2</sub>•<sup>-</sup>), the cells were again washed with fresh buffer,

a final concentration of 25  $\mu$ M dihydroethidium was added, and the cells incubated for 20 minutes. The cells were washed again and incubated in fresh Krebs-HEPES buffer for an additional hour. The cells were then harvested by scraping and homogenized in chilled 100% methanol. Cell lysates were centrifuged at 12,000 rpm for 10 minutes at 4°C, and the supernatant was used for measurement of superoxide levels using a Beckman Coulter System RP-HPLC equipped with a Jasco FP1520 fluorescence detector. The excitation and emission wavelengths were 480 nm and 580 nm, respectively. Data were collected and analyzed using chromatography software (32 Karat™ Beckman Coulter).

#### **Preparation of the SWNT/collagen sensor**

SWNT/collagen sensor was prepared according to our previous literature <sup>4</sup>. A 1 mg portion of SWNT was added to 1 mL of collagen solution (3.41 mg/mL) containing 0.02 M acetic acid, and the resulting mixture was sonicated for 10 min in an ice bath using a probe-tip sonicator (40% amplitude, 10 W). The suspension was then centrifuged for 3 h at 16,300g, and the supernatant decanted. A 20-mL portion of collagen-suspended SWNT solution as added to 40 mL of collagen solution (3.41 mg/mL), and the resulting solution was diluted with 4.14 mL of a 0.02 M acetic acid solution. The final SWNT solution (400 mL of 0.19 mg/mL SWNT) was added to each Petri dish and gently dried at room temperature for 20 h. Before being used for cellular experiments, the SWNT/collagen sensor was extensively washed with water and PBS (pH 8).

#### **Detection of H<sub>2</sub>O<sub>2</sub> in HUVEC by Semiconducting SWNT:**

Semiconducting SWNT emits stable photoluminescence (PL) <sup>5</sup> in the near infrared (nIR) region with no photobleaching threshold <sup>6</sup>, which allows long exposures and integration times compared to conventional organic fluorescent dyes. Recently, nIR fluorescent

SWNT has been shown to detect small molecules, even at the single-molecule level, by monitoring the step-wise fluorescence quenching of a single SWNT sensor<sup>4, 7</sup>. In particular, we have shown that the SWNT/collagen sensor is capable of detecting H<sub>2</sub>O<sub>2</sub> at the single-molecule level with high selectivity against other ROS. For this purpose, the SWNT/collagen sensor was prepared by slowly drying the diluted solution of collagen-suspended SWNT (final concentration of SWNT, 0.19 mg/mL) at room temperature on a glass-bottom petri dish, as previously described<sup>4</sup>. The SWNT/collagen sensor was clearly homogeneously distributed on glass without aggregation, such that a 2x2 pixel area (580 x 580 nm<sup>2</sup>) corresponded to a single SWNT sensor (SI- Fig. 5b). In addition, this sensor shows very bright and stable nIR fluorescence over long exposure times.

In order to investigate H<sub>2</sub>O<sub>2</sub> efflux from HUVEC stimulated by VEGF or Eu(OH)<sub>3</sub> nanorods, the cells were replated on the SWNT/collagen sensor in a petri dish filled with complete EBM medium. The cells on the SWNT sensor in the serum-starving medium (0.2% fetal bovine serum) were incubated for a further 12 h at 37°C, and then stimulated with VEGF (10 ng/mL) or nanorods (10 mg/mL). The nIR fluorescence response of the sensors underneath a single cell was then monitored in real time for 20 min to detect H<sub>2</sub>O<sub>2</sub> produced from HUVEC and analyzed using an algorithm to calculate the number of stochastic transitions in nIR fluorescence intensity caused by generated H<sub>2</sub>O<sub>2</sub>, as described in the supplementary information.

## **CHARACTERIZATION TECHNIQUES**

Characterization techniques for Eu<sup>III</sup>(OH)<sub>3</sub> nanorods are described briefly as follows.

### **X-ray diffraction (XRD)**

The structure and phase purity of the as-synthesized samples were determined by X-ray diffraction (XRD) analysis using a Bruker AXS D8 Advance Powder X-ray diffractometer (using  $\text{CuK}\alpha$ ,  $\lambda = 1.5418 \text{ \AA}$  radiation).

### **Transmission electron microscopy (TEM)**

Particle morphology (microstructures of the samples) was studied with TEM on an FEI Technai 12 instrument operating at 80 KV. Internalization of nanoparticles inside the cells was visualized by TEM according to our published description <sup>8</sup>.

### **nIR fluorescence microscopy**

Fluorescence images were taken using a fluorescence microscope (Carl Zeiss, Axiovert 200), with a CCD camera (Carl Zeiss, ZxioCam MRm) and 2D InGaAs array (Princeton Instruments OMA 2D). Videos were acquired using the WinSpec data acquisition program (Princeton Instruments). Samples were excited by a 658-nm laser (LDM-OPT-A6-13, Newport Corp) at 35 mW.

### **Cellular data analysis**

Cellular data were analyzed as described previously <sup>9</sup>. In the first step, a MATLAB routine selected 100 diffraction-limited spots (2x2 pixels) in the nIR images in the order of highest to lowest intensity. Each time trace obtained was then subjected to an error-minimizing, step-finding algorithm in which the intrinsic steps in intensity can be identified within noisy data. The best-fit traces were obtained in a manner analogous to linear regression, where idealized traces exhibiting minimized error deviation from the experimental traces were selected. Specifically, the experimental trace was initially fit to a flat trace with a value equal to the mean intensity value of the experimental trace. Next, the algorithm assumes the existence of a single step where the value prior to the step is

the mean intensity of the trace before the transition, and the value after the step is the mean intensity of the trace after the transition. The location of this step is iteratively fit at each time point within the trace, and the trace resulting in the best fit is selected. Once the location of the first transition is determined, the locations of the second and third steps are determined similarly by analyzing the bisections separately. In the region prior to this first transition, the algorithm once more assumes the existence of a step and determines its location by iteratively fitting the step to each time point prior to the transition. A similar analysis was performed at the second bisection or the region after the first transition, where the algorithm once more assumes the existence of a step and determines its location. The algorithm continues fitting steps to the bisections until the best fit is obtained. Finally, the number of transitions is calculated.

### ***Statistics***

Mean and standard deviations were calculated. We calculated the P values using the Student T-Test and reported significant results ( $P < 0.05$ ).

### **References:**

- 1.(a) Patra, C. R.; Bhattacharya, R.; Patra, S.; Vlahakis, N. E.; Gabashvili, A.; Koltypin, Y.; Gedanken, A.; Mukherjee, P.; Mukhopadhyay, D., Pro-angiogenic properties of europium(III) hydroxide nanorods. *Advanced Materials* **2008**, *20* (4), 753-756; (b) Patra, C. R.; Moneim, S. S. A.; Wang, E.; Dutta, S.; Patra, S.; Eshed, M.; Mukherjee, P.; Gedanken, A.; Shah, V. H.; Mukhopadhyay, D., In vivo toxicity studies of europium hydroxide nanorods in mice. *Toxicology and Applied Pharmacology* **2009**, *240* (1), 88-98.
- 2.(a) Kimmel, C. B.; Ballard, W. W.; Kimmel, S. R.; Ullmann, B.; Schilling, T. F., Stages of embryonic development of the zebrafish. *Dev. Dyn.* **1995**, *203* (3), 253-310; (b) Nicoli, S.; Presta, M., The zebrafish/tumor xenograft angiogenesis assay. *Nature Protocols* **2007**, *2*, 2918-2923; (c) Serbedzija, G. N.; Flynn, E.; Willett, C. E., Zebrafish angiogenesis: A new model for drug screening. *Angiogenesis* **3(4):353-359** **1999**, *3* (4), 353-359.



- 3.(a) Zhao, H.; Joseph, J.; Fales, H. M.; Sokoloski, E. A.; Levine, R. L.; Vasquez-Vivar, J.; Kalyanaraman, B., Detection and characterization of the product of hydroethidine and intracellular superoxide by HPLC and limitations of fluorescence. *Proc Natl Acad Sci U S A* **2005**, *102* (16), 5727-32; (b) Fink, B.; Laude, K.; McCann, L.; Doughan, A.; Harrison, D. G.; Dikalov, S., Detection of intracellular superoxide formation in endothelial cells and intact tissues using dihydroethidium and an HPLC-based assay. *Am J Physiol Cell Physiol* **2004**, *287* (4), C895-902.
4. Jin, H.; Heller, D. A.; Kim, J.-H.; Strano, M. S., Stochastic Analysis of Stepwise Fluorescence Quenching Reactions on Single-Walled Carbon Nanotubes: Single Molecule Sensors. *Nano Lett* **2008**, *8* (12), 4299-4304.
5. O'Connell, M. J.; Bachilo, S. M.; Huffman, C. B.; Moore, V. C.; Strano, M. S.; Haroz, E. H.; Rialon, K. L.; Boul, P. J.; Noon, W. H.; Kittrell, C.; Ma, J. P.; Hauge, R. H.; Weisman, R. B.; Smalley, R. E., Band gap fluorescence from individual single-walled carbon nanotubes. *Science* **2002**, *297* (5581), 593-596.
6. (a) Heller, D. A.; Baik, S.; Eurell, T. E.; Strano, M. S., Single-walled carbon nanotube spectroscopy in live cells: Towards long-term labels and optical sensors. *Advanced Materials* **2005**, *17*, 2793; (b) Li, Q. W.; Zhang, X. F.; DePaula, R. F.; Zheng, L. X.; Zhao, Y. H.; Stan, L.; Holesinger, T. G.; Arendt, P. N.; Peterson, D. E.; Zhu, Y. T., Sustained growth of ultralong carbon nanotube arrays for fiber spinning. *Advanced Materials* **2006**, *18* (23), 3160.
7. (a) Jin, H.; Heller, D. A.; Kalbacova, M.; Kim, J. H.; Zhang, J. Q.; Boghossian, A. A.; Maheshri, N.; Strano, M. S., Detection of single-molecule H<sub>2</sub>O<sub>2</sub> signalling from epidermal growth factor receptor using fluorescent single-walled carbon nanotubes. *Nature Nanotechnology* **2010**, *5* (4), 302-U81; (b) Cognet, L.; Tsyboulski, D. A.; Rocha, J. D. R.; Doyle, C. D.; Tour, J. M.; Weisman, R. B., Stepwise quenching of exciton fluorescence in carbon nanotubes by single-molecule reactions. *Science* **2007**, *316* (5830), 1465-1468.
8. Patra, C. R.; Bhattacharya, R.; Patra, S.; Basu, S.; Mukherjee, P.; Mukhopadhyay, D., Inorganic phosphate nanorods are a novel fluorescent label in cell biology. *J Nanobiotechnology* **2006**, *4* (11).
9. Zhang, J. Q.; Boghossian, A. A.; Barone, P. W.; Rwei, A.; Kim, J. H.; Lin, D. H.; Heller, D. A.; Hilmer, A. J.; Nair, N.; Reuel, N. F.; Strano, M. S., Single Molecule Detection of Nitric Oxide Enabled by d(AT)(15) DNA Adsorbed to Near Infrared Fluorescent Single-Walled Carbon Nanotubes. *Journal of the American Chemical Society* **2011**, *133* (3), 567-581.

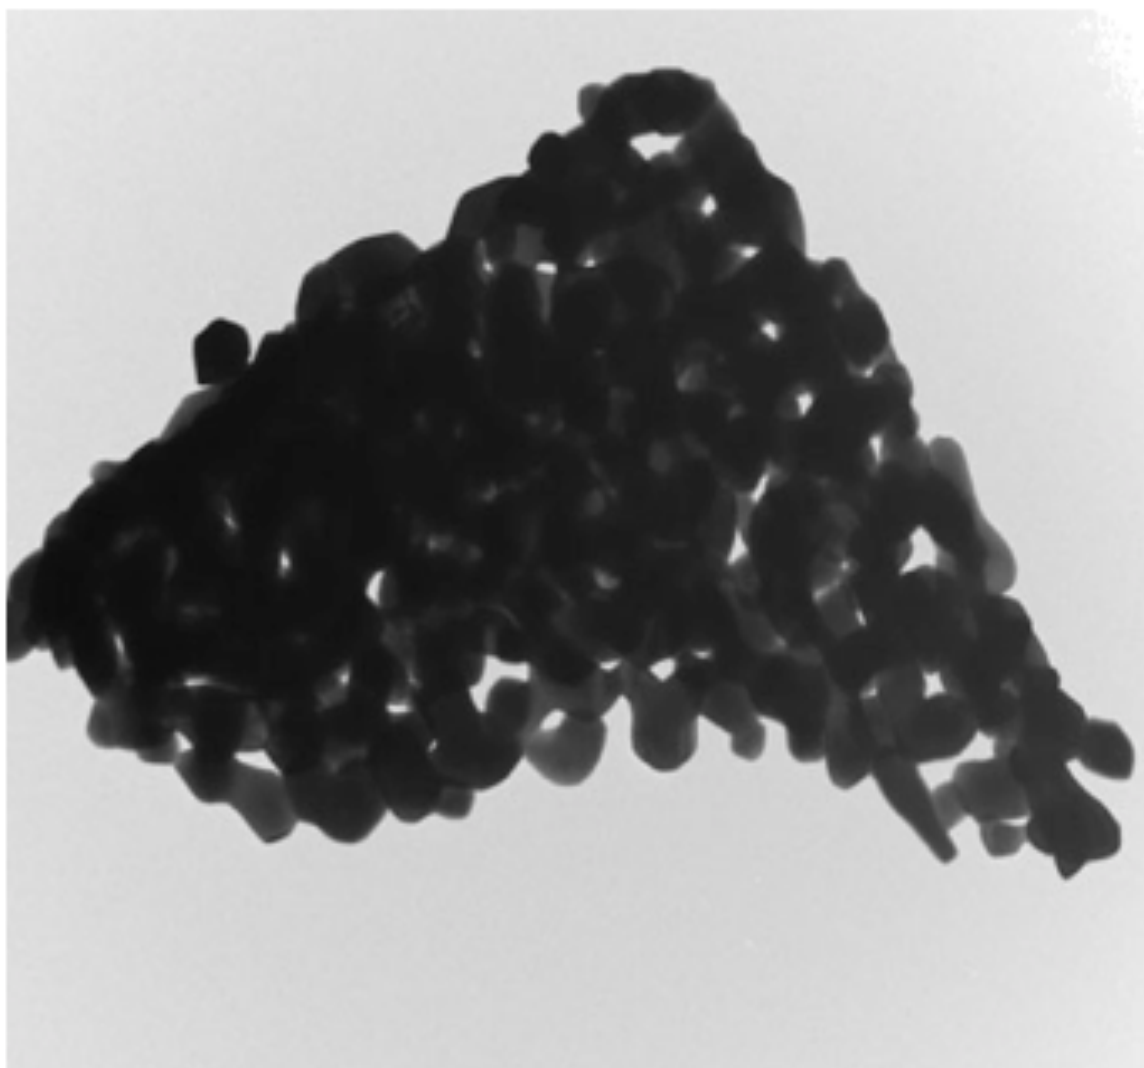

**SI-Fig.1: Physical characterizations of  $\text{Eu}_2\text{O}_3$  nanopowder.** TEM picture of  $\text{Eu}_2\text{O}_3$  nanopowder obtained from Sigma-Aldrich, USA shows  $\sim 200$  nm particle size.

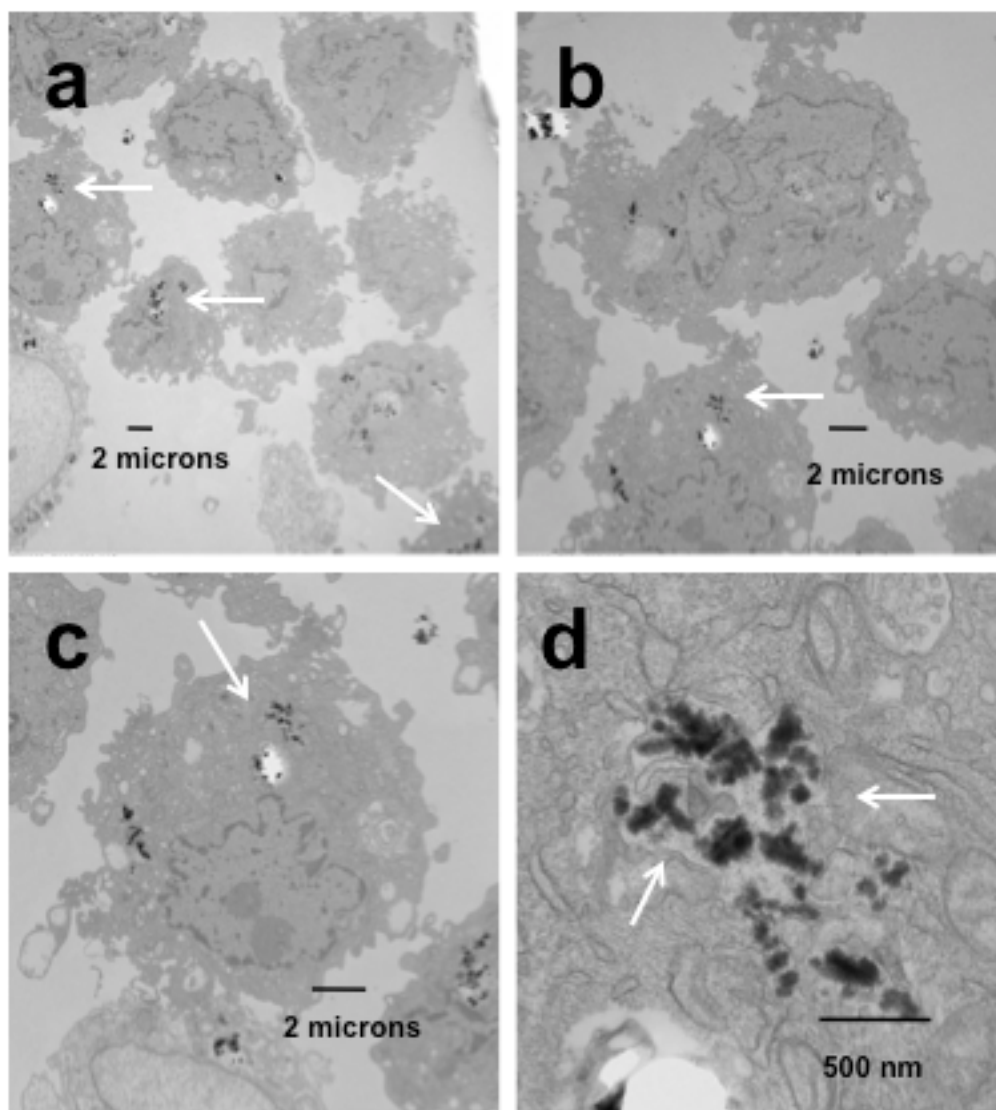

**SI-Fig.-2 (a-d): Cellular uptake and internalization of  $[\text{Eu}^{\text{III}}(\text{OH})_3]$  nanorods in HUVECs has been visualized using transmission electron microscopy (TEM).** Cells were observed by TEM after HUVECs were exposed to  $[\text{Eu}^{\text{III}}(\text{OH})_3]$  nanorods for 24 h incubation at  $10 \mu\text{g}/\text{mL}$  concentrations of nanorods in EBM serum free media. Nanoparticles are clearly visible in endocytic compartments within the cell (indicated by white arrows from low magnification to high magnification in a-d).

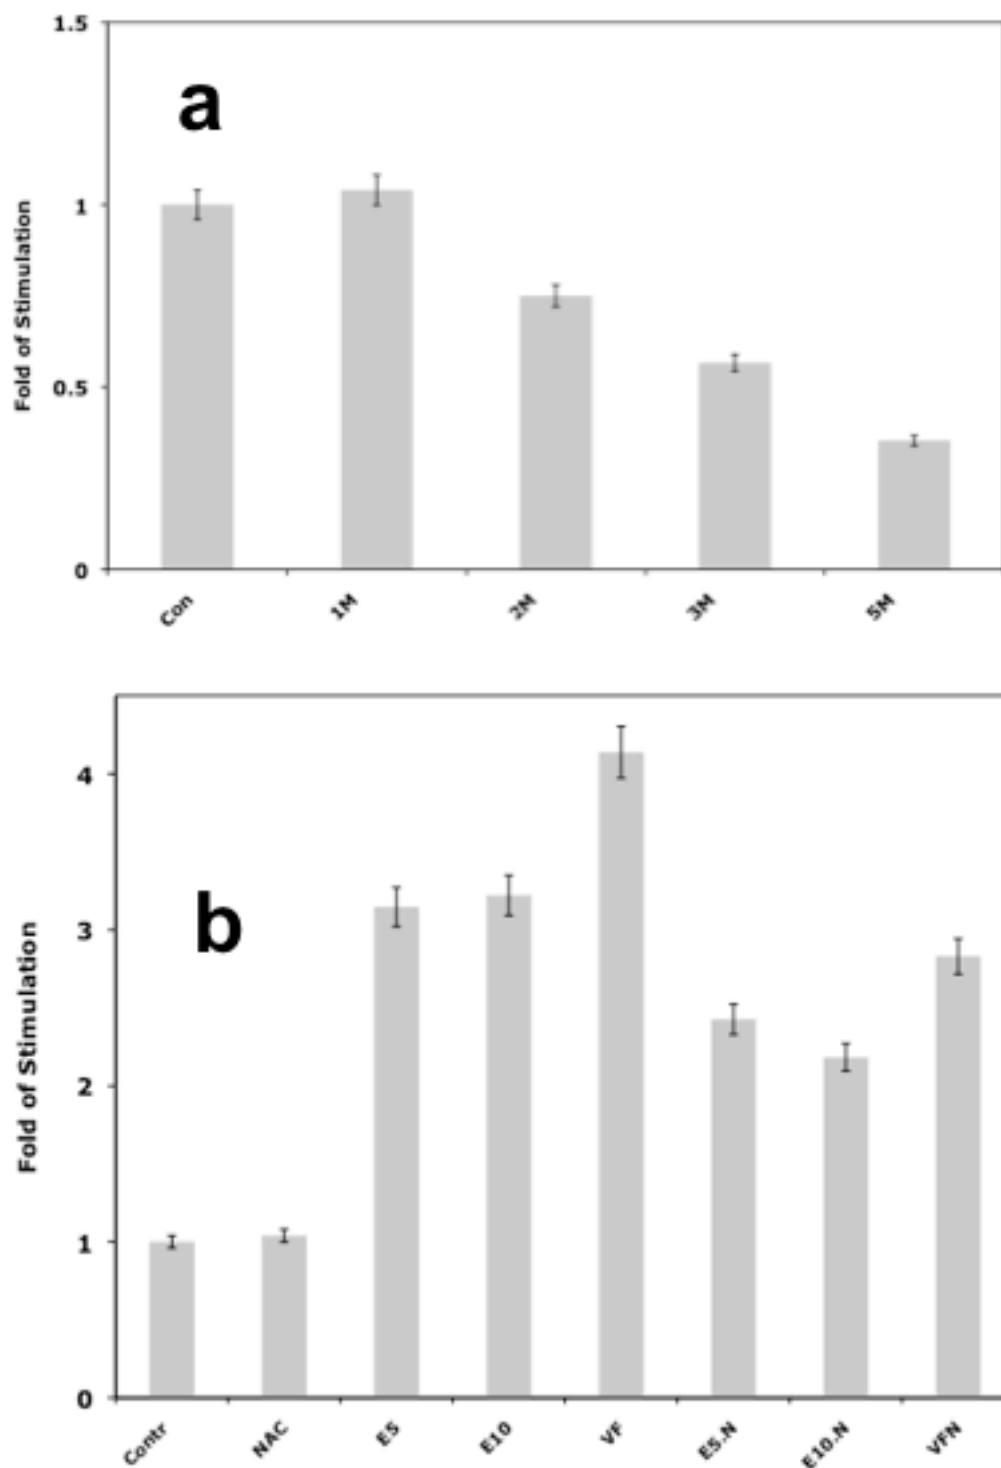

**SI-Figure-3 (a-b):** Cell proliferation assay of HUVECs using radioactive [ $^3\text{H}$ ]-thymidine. **a.** Cell proliferation assay was carried out at different concentration (1M to 5M) of *N*-acetyl-L-cysteine (NAC) and it was observed that up to 1M the HUVECs were non-toxic. However, beyond the 1(M) concentration of NAC the cells are toxic. **b.** Cell proliferation assay was carried out using nanorods and VEGF in presence of *N*-acetyl-L-cysteine as ROS scavenger. E5.N and E10.N indicate the concentration of 5 and 10  $\mu\text{g}$  of nanorods at 1M NAC. The data are statistically significant where  $p \leq 0.05$ . [(mean $\pm$ SD of 3 separate experiments performed in triplicates)]. Endothelial cell proliferation, represented as fold stimulation is increased with increasing concentration of [ $\text{Eu}^{\text{III}}(\text{OH})_3$ ] nanorods from 1-to 10 $\mu\text{g}/\text{ml}$ .

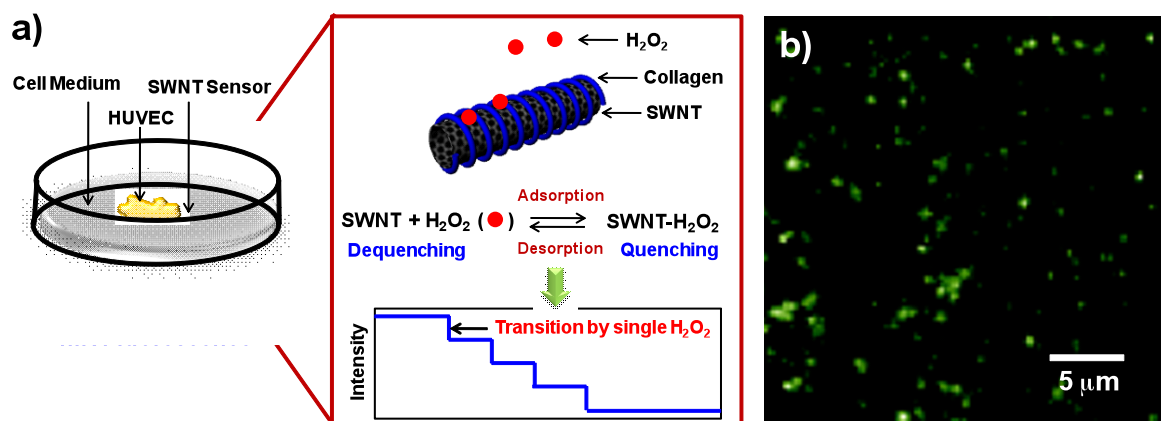

**SI-Fig.4. (a-b). Single molecule detection of H<sub>2</sub>O<sub>2</sub> efflux produced from HUVEC on SWNT/ collagen sensor. a) Schematic illustration of SWNT/collagen sensor for detection of H<sub>2</sub>O<sub>2</sub> through stochastic nIR fluorescence quenching. b) nIR fluorescence image of SWNT/collagen sensor underneath HUVEC.**

VEGF-A

Patra et al.

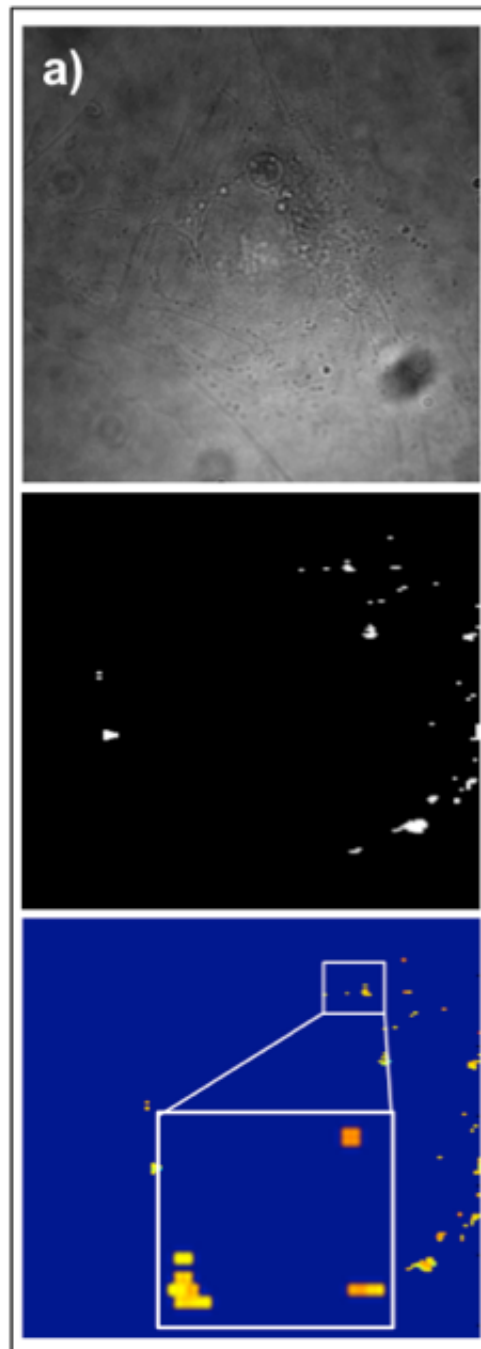

**SI-Figure 5:** Single-molecule detection of  $H_2O_2$  efflux from HUVEC treated with VEGF with the SWNT/collagen sensor.
